# Supplementary material
Source: PubMed Central journal article supplement (PMC8223954)
Supplement: jb.00109-21-s0001.pdf [file jb.00109-21-s0001.pdf]

## Supplementary Figure Legends

**Fig. S1.** Effect of *hns* and *cyoA* mutations on novobiocin and erythromycin resistance phenotype of the parental ( $\Delta$ *acrABE*) strain. LBA, lysogenic broth agar; LBA+NE, lysogenic broth agar plus novobiocin (1.25 or 2.5  $\mu$ g/ml) and erythromycin (1.25 or 2.5  $\mu$ g/ml). Plates were incubated for 24h at 37°C. Relevant genotypes are shown.

**Fig S2.** Effect of an in-frame deletion of *mdtA* on novobiocin resistance of a  $\Delta$ *acrABE* strain containing either the *baeS51* or *rpoB58* mutation. LBA, lysogenic broth agar; LBA+N, lysogenic broth agar plus novobiocin (3.0  $\mu$ g/ml). Plates were incubated for 24h at 37°C. Relevant genotypes are shown.

LBA

LBA+NE

LBA

LBA+NE

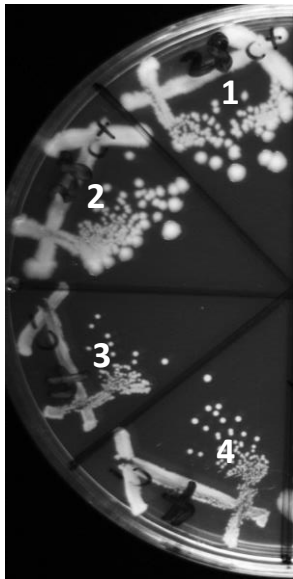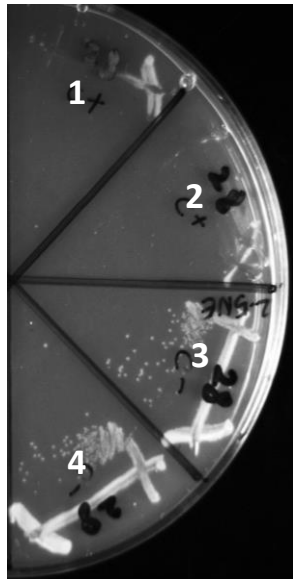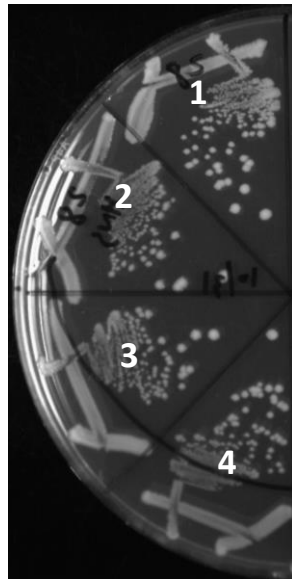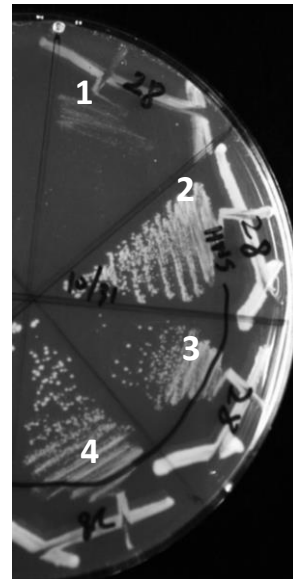

1.  $\Delta acrABE$
2.  $\Delta acrABE$
3.  $\Delta acrABE \Delta cyaA$
4.  $\Delta acrABE \Delta cyaA$

1.  $\Delta acrABE$
2.  $\Delta acrABE \Delta hns$
3.  $\Delta acrABE \Delta hns$
4.  $\Delta acrABE \Delta hns$

LBA

LBA+Nov

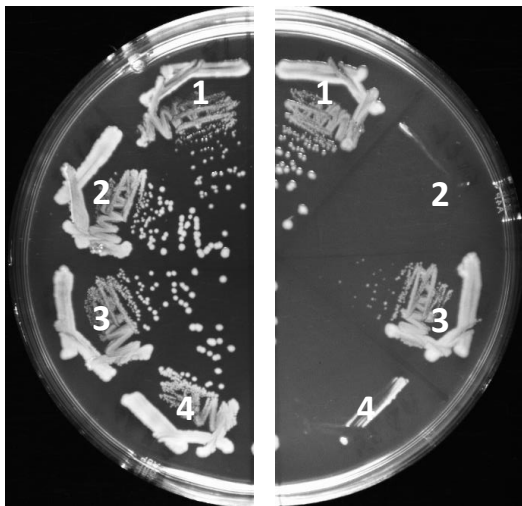

1. *baeS51*
2. *baeS51*  $\Delta$ *mdtA*
3. *rpoB58*
4. *rpoB58*  $\Delta$ *mdtA*

**Table S3.** Effect of *rpoS* or *dksA* deletion on minimal inhibitory concentration of novobiocin

| Strain genotype                                         | Novobiocin Minimal Inhibitory Concentration ( $\mu\text{g/ml}$ ) |
|---------------------------------------------------------|------------------------------------------------------------------|
| $\Delta\text{acrABE}$                                   | $\leq 1.0$                                                       |
| $\Delta\text{acrABE } \Delta\text{rpoS}$                | $\leq 1.0$                                                       |
| $\Delta\text{acrABE } \Delta\text{dksA}$                | $\leq 1.0$                                                       |
| $\Delta\text{acrABE } \text{rpoB58}$                    | 4.0                                                              |
| $\Delta\text{acrABE } \text{rpoB58 } \Delta\text{rpoS}$ | 4.0                                                              |
| $\Delta\text{acrABE } \text{rpoB58 } \Delta\text{dksA}$ | $\leq 1.0$                                                       |
| WT                                                      | 64                                                               |
| $\Delta\text{rpoS}$                                     | 64                                                               |
| $\Delta\text{dksA}$                                     | 32                                                               |

MIC was conducted by a two-fold serial dilution method, as described in the main text
